# Supplementary material for: A Fully Integrated Assay Panel for Early Drug Metabolism and Pharmacokinetics Profiling
Source: PubMed Central journal article supplement (PMC7567642; doi:10.1089/adt.2020.970), 2020-05-20
Supplement: Supp_Data.pdf [file Supp_Data.pdf]

# Supplemental Data

## A fully integrated assay panel for early DMPK profiling

Johan Wernevik<sup>1,\*</sup>, Fredrik Bergström<sup>2</sup>, Anna Novén<sup>1</sup>, Johan Hulthe<sup>1</sup>, Linda Fredlund<sup>1</sup>, Dan Addison<sup>3</sup>,  
Jan Holmgren<sup>4</sup>, Per-Erik Strömstedt<sup>1</sup>, Erika Rehnström<sup>5</sup> and Thomas Lundbäck<sup>1,\*</sup>

<sup>1</sup> Mechanistic Biology & Profiling, Discovery Sciences, R&D, AstraZeneca, Gothenburg, Sweden

<sup>2</sup> DMPK, Early CVRM, BioPharmaceuticals R&D, AstraZeneca, Gothenburg, Sweden

<sup>3</sup> Sample Management, Discovery Sciences, R&D, AstraZeneca, Cambridge, UK

<sup>4</sup> Sample Management, Discovery Sciences, R&D, AstraZeneca, Gothenburg, Sweden

<sup>5</sup> Clinical Sampling & Alliances, Precision Medicine, AstraZeneca, Gothenburg, Sweden

Running title: DMPK Wave 1 assay panel

\* Corresponding authors:

johan.wernevik@astrazeneca.com

+46 (0)31-776 13 32

thomas.lundback@astrazeneca.com

+46 (0)72-711 66 89

Keywords: mass spectrometry, automation, DMPK, profiling, assay panels

**Supplemental Table 1. Composition of validation sets**

| <b>logD7.4</b>  | <b>PPB</b>       | <b>Mics</b>        | <b>Heps</b>  |
|-----------------|------------------|--------------------|--------------|
| Acetaminophen   | Acetaminophen    | Acetaminophen      | Bosentan     |
| Alprenolol      | Amiloride        | Antipyrine         | Caffeine     |
| Amiodarone      | Astemizole       | Benzydamine        | Carvedilol   |
| Antipyrine      | Atenolol         | Bosentan           | Diazepam     |
| Atropine        | Bepriidil        | Bufuralol          | Diclofenac   |
| Bifonazole      | Bumetanide       | Caffeine           | Diflunisal   |
| Caffeine        | Chlorpromazine   | Carvedilol         | Dofetilide   |
| Carbamazepine   | Ciprofloxacin    | Cefoperazone       | Imipramine   |
| Chloramphenicol | Clozapine        | cervastatin        | Indapamide   |
| Chlorpromazine  | Desipramine      | Chlordiazepoxide   | Internal     |
| Chlorthalidone  | Diazepam         | Desipramine        | Internal     |
| Cimetidine      | Disopyramide     | Diazepam           | Internal     |
| Clonidine       | Etodolac         | Diclofenac         | Internal     |
| Clotrimazole    | Etoposide        | Diflunisal         | Internal     |
| Clozapine       | Fentiazac        | Diltiazem          | Internal     |
| Codeine         | Fluconazole      | Dofetilide         | Lorazepam    |
| Diphenhydramine | Flucytosine      | Etodolac           | Midazolam    |
| Disopyramide    | Haloperidol      | Furosemide         | Nifedipine   |
| Flecainide      | Imipramine       | Glipizide          | Oxaprozin    |
| Fluconazole     | Ketoconazole     | Granisetron        | Prazosin     |
| Haloperidol     | Loratadine       | Internal           | Terfenadine  |
| Imipramine      | Methotrexate     | Internal           | Troglitazone |
| Lidocaine       | Metoclopramide   | Internal           | Warfarin     |
| Metoclopramide  | Metoprolol       | Imipramine         | Verapamil    |
| Metronidazole   | Nadolol          | Irbesartan         |              |
| Mexiletine      | Nimesulide       | Ketanserin         |              |
| Nizatidine      | Octreotide       | Lorazepam          |              |
| Pirenzepine     | Pindolol         | Methylprednisolone |              |
| Prednisolone    | Pravastatin      | Metoprolol         |              |
| Prednisone      | Prazosin         | Midazolam          |              |
| Procainamide    | Promethazine     | Nifedipine         |              |
| Propafenone     | Propranolol      | Ondansetron        |              |
| Propranolol     | Quinidine        | Oxaprozin          |              |
| Quinidine       | Rifabutin        | Phenancetin        |              |
| Ranitidine      | Rifampin         | Pindolol           |              |
| Risperidone     | Sildenafil       | Prazosin           |              |
| Sotalol         | Sulfamethoxazole | Prednisolone       |              |
| Sumatriptan     | Sulfaphenazole   | Quinidine          |              |
| Tetracaine      | Suprofen         | Sildenafil         |              |
| Thioridazine    | Terbutaline      | Theophylline       |              |
| Tiotidine       | Timolol          | Timolol            |              |
| Triamterene     | Tolbutamide      | Troglitazone       |              |
| Triflupromazine | Triazolam        | Trovafloracin      |              |
| Trimethoprim    | Trimethoprim     | Warfarin           |              |
|                 | Warfarin         | Verapamil          |              |
|                 | Verapamil        | Zolpidem           |              |
|                 | Zomepirac        |                    |              |
